# Supplementary material
Source: MDPI journal article supplement (https://www.mdpi.com/2077-0472/13/8/1636)
Supplement: s1 [file s1]

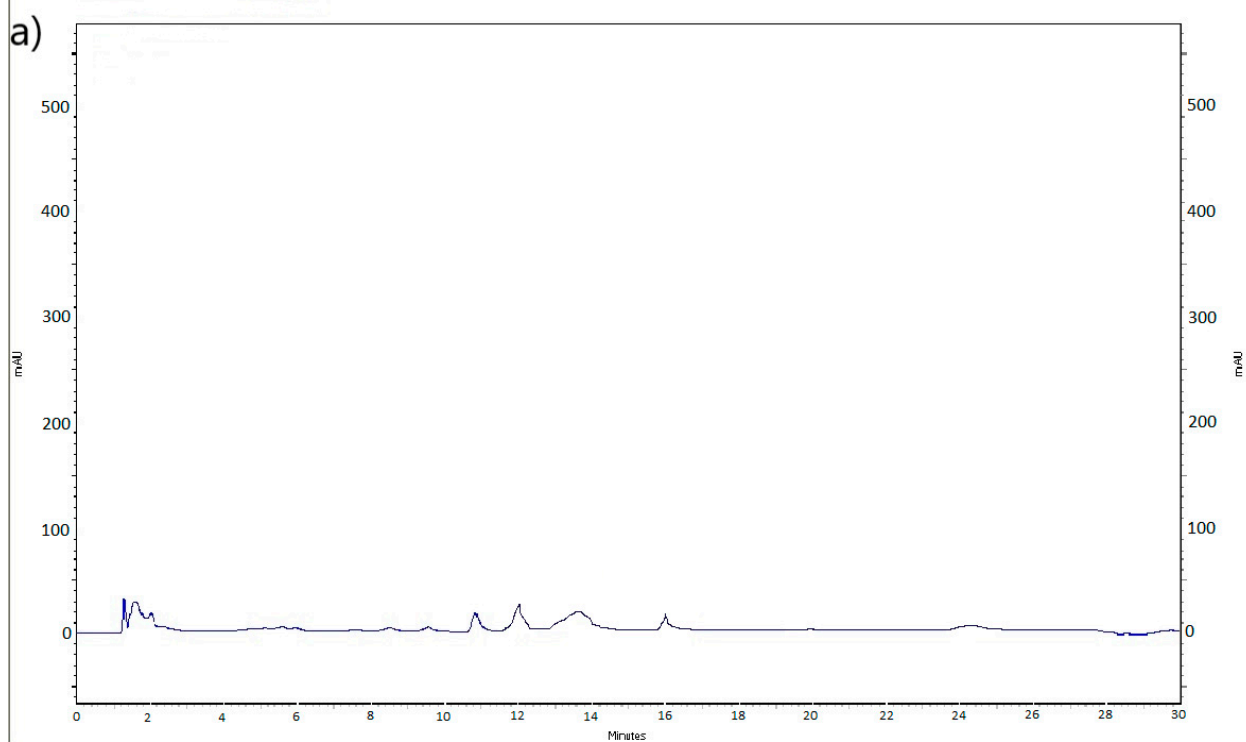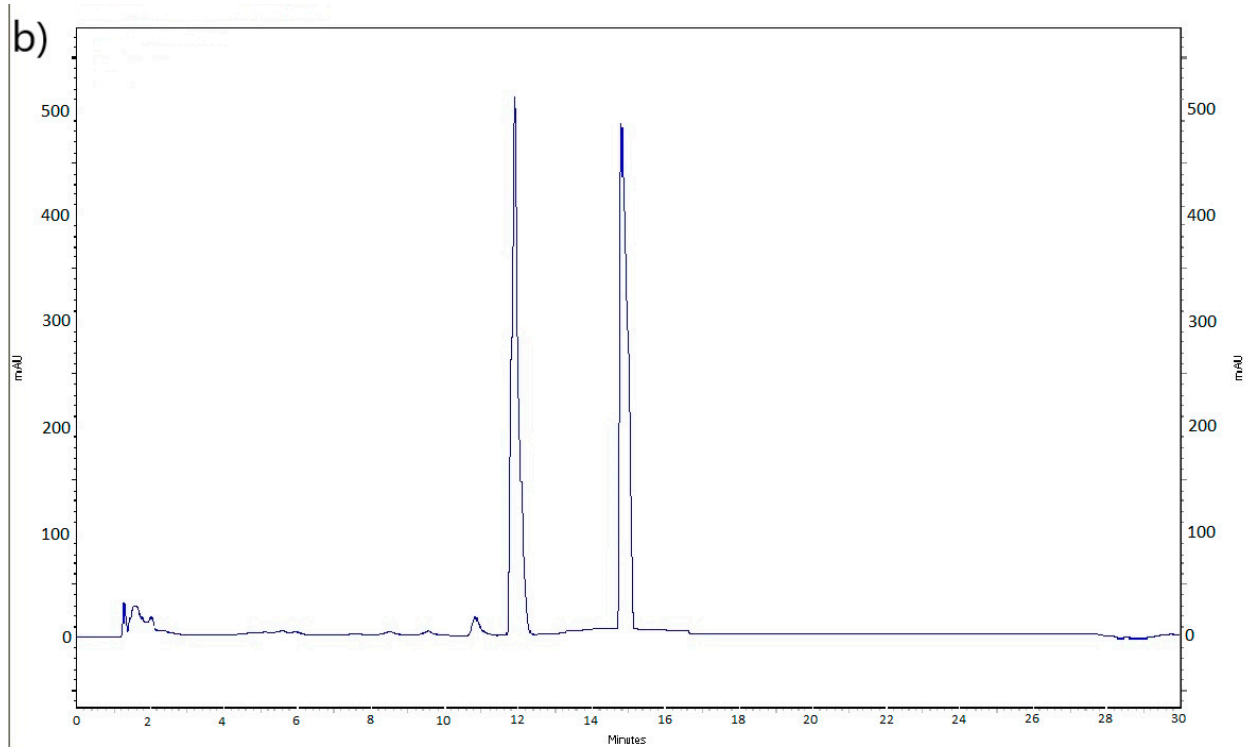

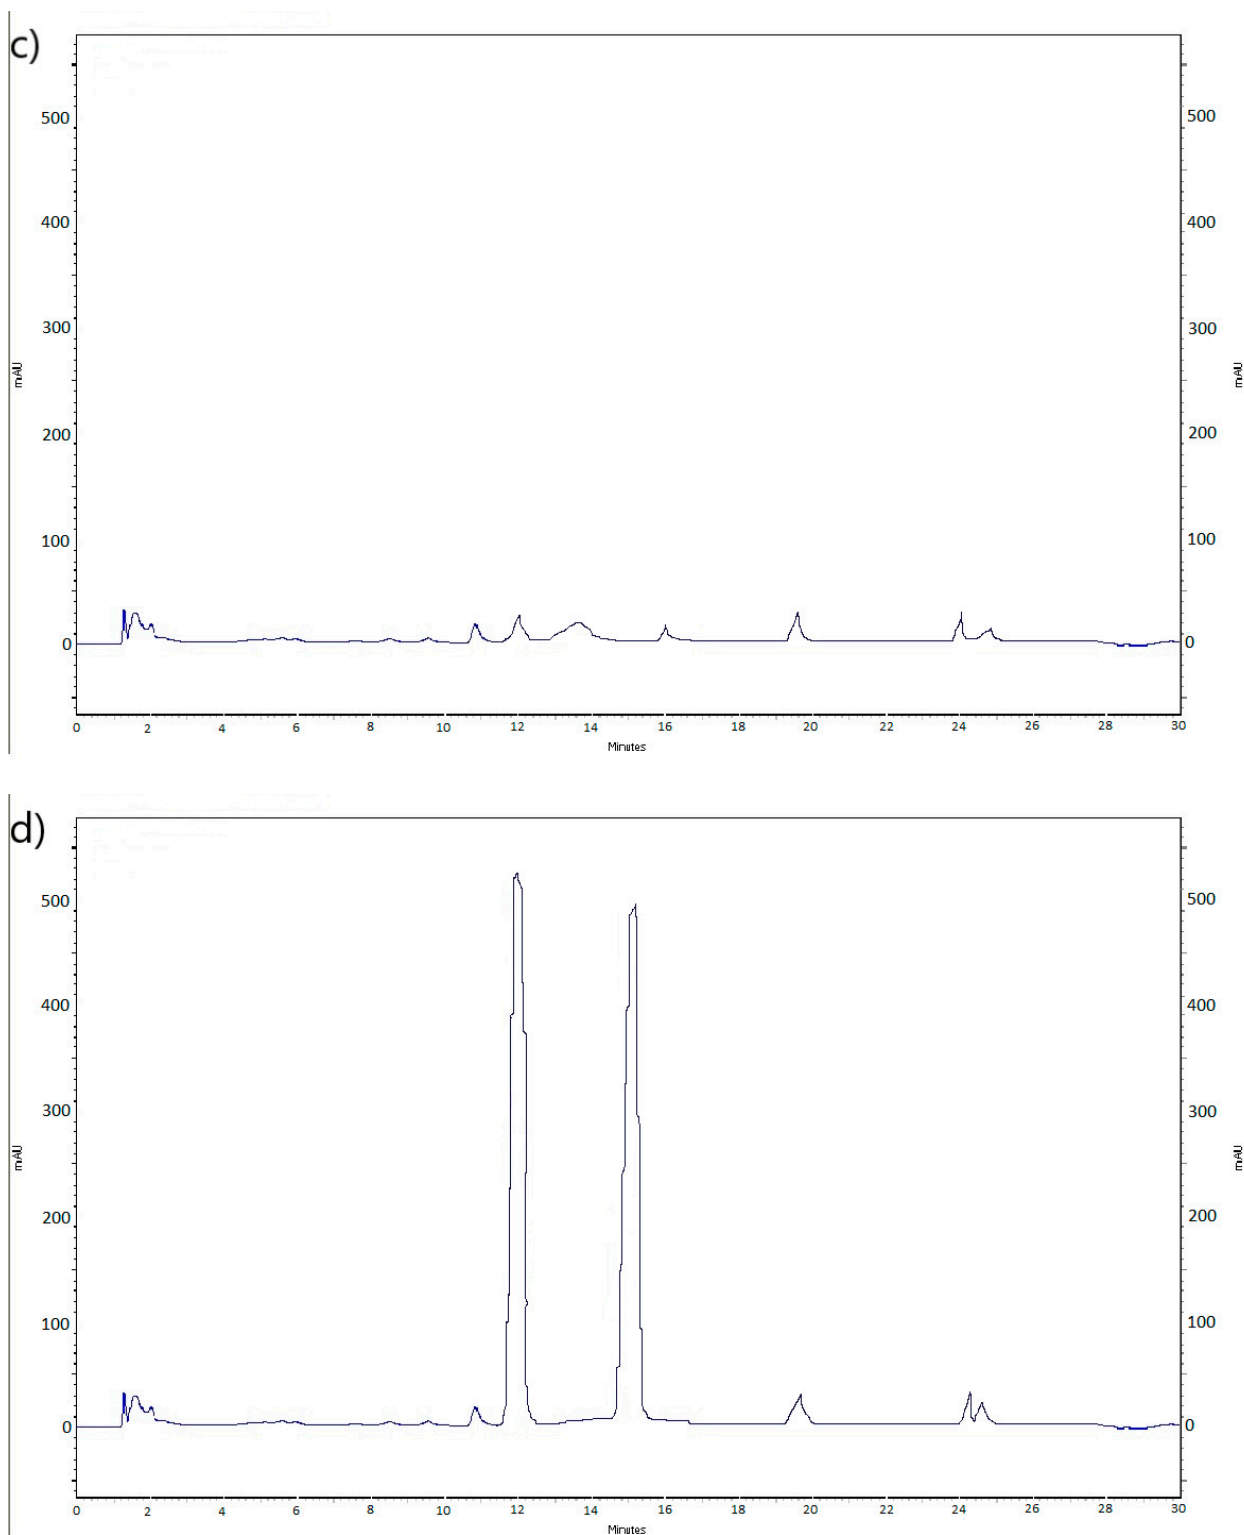

**Supplementary Figure S1.** HPLC-DAD chromatographs of (a) garlic bulb blank, (b) spiked garlic bulb matrix with boscalid and pyraclostrobin (0.020 mg/Kg), (c) green garlic blank, and (d) spiked green garlic. The retention time for boscalid is 11.81 min and for pyraclostrobin 14.85 min. The gradient mobile phase is consisted of acetonitrile (M) and water (W) and the flow rate was 1.0 mL/min, including the following gradient: 20%-M/80%/-W (0–10 min), 80%-M/20%/-W (10–11 min), 95%-M/5%-W (11–25 min), and 20%-M/80%-W (26–30 min).
